# Supplementary material for: Hypotension and Environmental Noise: A Replication Study
Source: Int J Environ Res Public Health. 2014 Aug 26;11(9):8661–88. doi: 10.3390/ijerph110908661 (PMC4198985; doi:10.3390/ijerph110908661)
Supplement: Supplementary File 1 [file ijerph-11-08661-s001.pdf]

# Hypotension and Environmental Noise: A Replication Study

**Figure S1.** The sampling procedure around 31 noise measurement points from the three areas of the lower Inn valley, Austria.

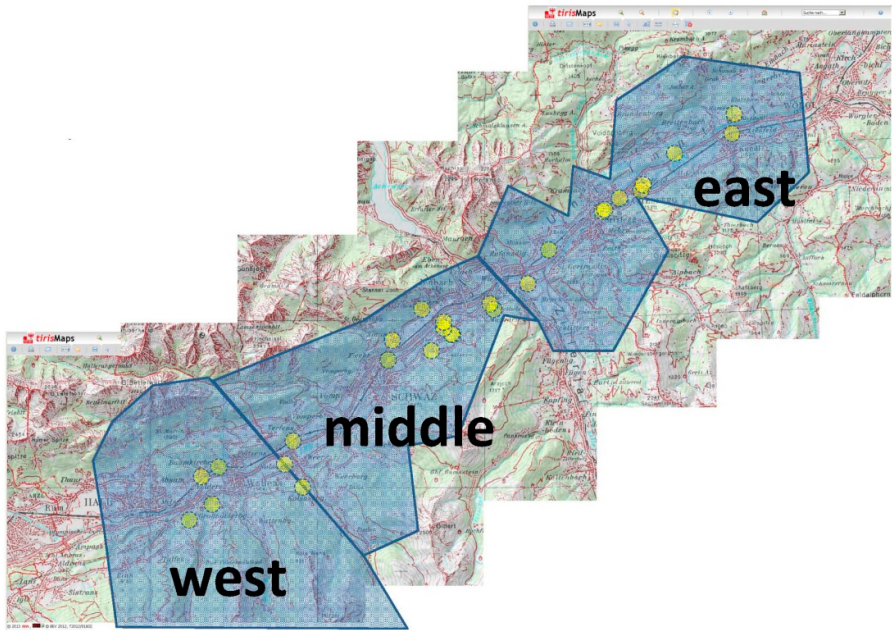

**Figure S2.** Age-sex distribution of reported hypotension in the reduced sample (a) and the full sample (b).

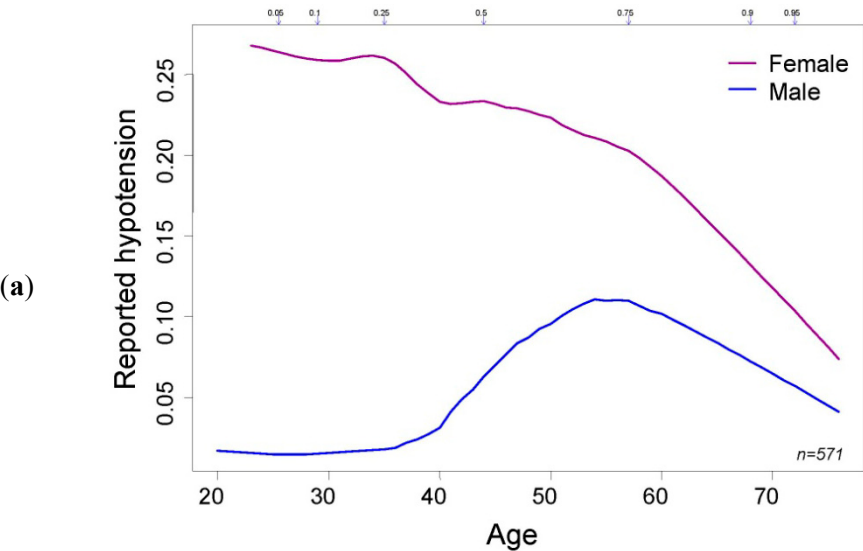

Figure S2. Cont.

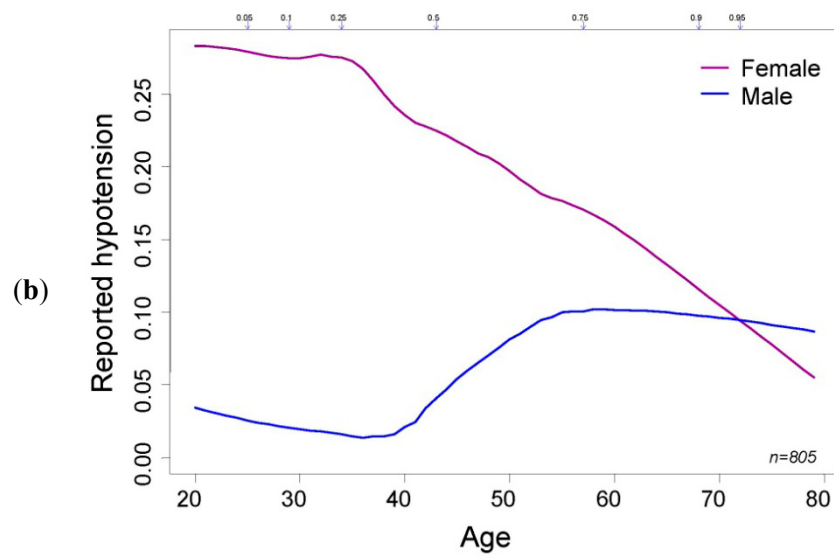

**Figure S3.** Age-sex distribution of reported hypotension in the reduced sample (a) and the full sample (b).

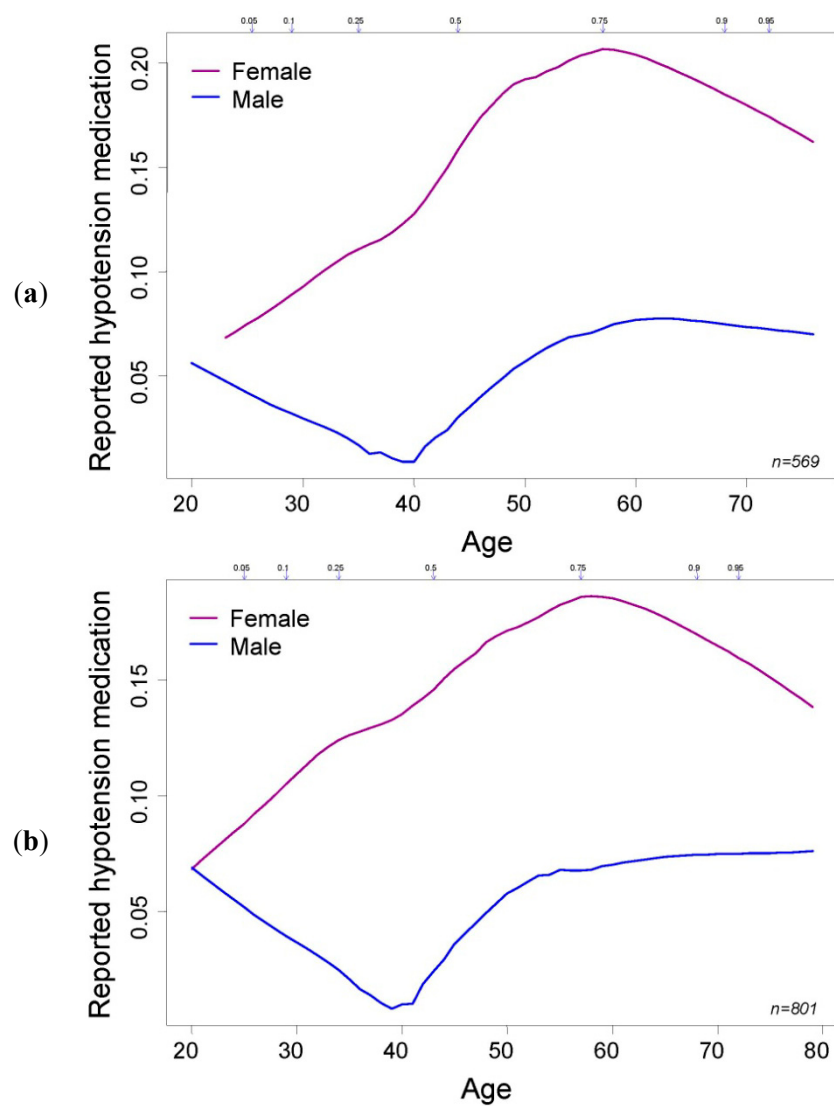

**Table S1.** Description of the relationships between main study variables and the two health outcomes (reduced sample).

| Categorical Variables          | Reported<br>Hypotension: No | Reported<br>Hypotension: Yes | Chi-Square-<br>Statistic | Hypotension<br>Medication: No | Hypotension<br>Medication: Yes | Chi-Square-<br>Statistic |
|--------------------------------|-----------------------------|------------------------------|--------------------------|-------------------------------|--------------------------------|--------------------------|
|                                | n (%)                       | n (%)                        | p value                  | n (%)                         | n (%)                          | p value                  |
| Total                          | 485 (85)                    | 87 (15)                      |                          | 510 (89)                      | 60 (11)                        |                          |
| Gender                         |                             |                              | <0.001                   |                               |                                | <0.001                   |
| Female                         | 256 (52.8)                  | 73 (83.9)                    |                          | 280 (54.9)                    | 49 (81.7)                      |                          |
| Male                           | 229 (47.2)                  | 14 (16.1)                    |                          | 230 (45.1)                    | 11 (18.3)                      |                          |
| Health status                  |                             |                              | 0.002                    |                               |                                | <0.001                   |
| Very good/good                 | 275 (56.7)                  | 33 (37.9)                    |                          | 296 (58)                      | 12 (20)                        |                          |
| Less than good                 | 210 (43.3)                  | 54 (62.1)                    |                          | 214 (42)                      | 48 (80)                        |                          |
| Educational level              |                             |                              | 0.335                    |                               |                                | 0.107                    |
| Basic                          | 137 (28.5)                  | 22 (25.3)                    |                          | 140 (27.7)                    | 19 (32.2)                      |                          |
| Skilled labor                  | 163 (34)                    | 34 (39.1)                    |                          | 174 (34.4)                    | 21 (35.6)                      |                          |
| Vocational                     | 100 (20.8)                  | 22 (25.3)                    |                          | 106 (20.9)                    | 16 (27.1)                      |                          |
| A-level                        | 80 (16.7)                   | 9 (10.3)                     |                          | 86 (17)                       | 3 (5.1)                        |                          |
| Area of valley                 |                             |                              | 0.742                    |                               |                                | 0.88                     |
| East                           | 154 (31.8)                  | 24 (27.6)                    |                          | 160 (31.4)                    | 18 (30)                        |                          |
| Middle                         | 216 (44.5)                  | 41 (47.1)                    |                          | 229 (44.9)                    | 26 (43.3)                      |                          |
| West                           | 115 (23.7)                  | 22 (25.3)                    |                          | 121 (23.7)                    | 16 (26.7)                      |                          |
| Family history of hypertension |                             |                              | 0.006                    |                               |                                | 0.294                    |
| Yes                            | 157 (32.4)                  | 42 (48.3)                    |                          | 173 (33.9)                    | 25 (41.7)                      |                          |
| No                             | 327 (67.6)                  | 45 (51.7)                    |                          | 337 (66.1)                    | 35 (58.3)                      |                          |
| Antihypertensive treatment     |                             |                              | <0.001                   |                               |                                | 0.006                    |
| No                             | 388 (80.3)                  | 85 (98.8)                    |                          | 416 (81.6)                    | 57 (96.6)                      |                          |
| Yes                            | 95 (19.7)                   | 1 (1.2)                      |                          | 94 (18.4)                     | 2 (3.4)                        |                          |

Table S1. Cont.

| Continuous Variables                                | Reported<br>Hypotension: No<br>Median (IQR) | Reported<br>Hypotension: Yes<br>Median (IQR) | <i>p</i> Value<br>Ranksum Test | Hypotension<br>Medication: No<br>Median(IQR) | Hypotension<br>Medication: Yes<br>Median(IQR) | <i>p</i> Value<br>Ranksum Test |
|-----------------------------------------------------|---------------------------------------------|----------------------------------------------|--------------------------------|----------------------------------------------|-----------------------------------------------|--------------------------------|
| Age                                                 |                                             |                                              | 0.294                          |                                              |                                               | 0.02                           |
| median (IQR)                                        | 44 (35, 58)                                 | 42 (34.5, 54)                                |                                | 43 (34, 57)                                  | 52 (40, 60)                                   |                                |
| Body mass index                                     |                                             |                                              | <0.001                         |                                              |                                               | 0.002                          |
| median (IQR)                                        | 26 (23.1, 28.8)                             | 23.5 (21.5, 26.4)                            |                                | 25.9 (22.9, 28.7)                            | 24.3 (21.7, 26.6)                             |                                |
| Total sound level: dBA, Ldn+                        |                                             |                                              | 0.191                          |                                              |                                               | 0.87                           |
| median (IQR)                                        | 58.2 (54.7, 61.7)                           | 58.7 (55.2, 64.8)                            |                                | 58.3 (54.9, 61.9)                            | 57.7 (53.8, 64.3)                             |                                |
| Rail sound level: dBA, Ldn+                         |                                             |                                              | 0.292                          |                                              |                                               | 0.915                          |
| median (IQR)                                        | 55 (52, 60.1)                               | 55.2 (52.3, 63.8)                            |                                | 55.2 (52.2, 60.2)                            | 54 (51.7, 63.9)                               |                                |
| Highway sound level: dBA, Ldn+                      |                                             |                                              | 0.546                          |                                              |                                               | 0.937                          |
| median (IQR)                                        | 54.2 (50.2, 56.5)                           | 54.2 (51, 57.2)                              |                                | 54.2 (50.4, 56.6)                            | 54.2 (49.3, 57.4)                             |                                |
| Distance to main road                               |                                             |                                              | 0.024                          |                                              |                                               | 0.404                          |
| median (IQR)                                        | 472.2 (200.2, 1202.1)                       | 306.1 (160.5, 1129.6)                        |                                | 438.2 (185.1, 1193)                          | 380 (171.4, 1136.7)                           |                                |
| Annoyance by local road                             |                                             |                                              | 0.318                          |                                              |                                               | 0.004                          |
| median (IQR)                                        | 4 (2, 6)                                    | 5 (2, 6)                                     |                                | 4 (1.8, 6)                                   | 5 (3, 7.2)                                    |                                |
| NO <sub>2</sub> : annual average, µg/m <sup>3</sup> |                                             |                                              | 0.483                          |                                              |                                               | 0.617                          |
| median (IQR)                                        | 34 (32.2, 36.1)                             | 34.4 (32.4, 36.4)                            |                                | 34 (32.2, 36.2)                              | 33.9 (32.1, 35.8)                             |                                |
| Noise sensitivity *                                 |                                             |                                              | 0.022                          |                                              |                                               | 0.019                          |
| median (IQR)                                        | 5 (2, 8)                                    | 6 (3, 8)                                     |                                | 5 (2, 8)                                     | 6.5 (3, 9)                                    |                                |
| Weather sensitivity *                               |                                             |                                              | <0.001                         |                                              |                                               | <0.001                         |
| median (IQR)                                        | 3 (1, 5)                                    | 5 (3.2, 8)                                   |                                | 3 (1, 5)                                     | 6 (4, 8)                                      |                                |
| GHQ score *                                         |                                             |                                              | <0.001                         |                                              |                                               | <0.001                         |
| median (IQR)                                        | 21 (18, 26)                                 | 24 (20, 29.8)                                |                                | 21 (18, 26)                                  | 25 (21, 30.8)                                 |                                |
| Sleep score *                                       |                                             |                                              | 0.002                          |                                              |                                               |                                |
| median (IQR)                                        | 6 (3, 10)                                   | 9 (4, 13)                                    |                                | 6 (3, 10)                                    | 10 (6, 14.5)                                  |                                |
| Systolic BP: 2nd reading                            |                                             |                                              | <0.001                         |                                              |                                               | <0.001                         |
| median (IQR)                                        | 136 (123, 150)                              | 121 (110, 132)                               |                                | 135 (121, 150)                               | 125.5 (111.5, 136)                            |                                |
| Diastolic BP: 2nd reading                           |                                             |                                              | <0.001                         |                                              |                                               | <0.001                         |
| median (IQR)                                        | 89 (80.2, 96)                               | 83 (73.5, 88.5)                              |                                | 88.5 (80, 96)                                | 84.5 (75, 90)                                 |                                |
| Systolic BP: 4th reading                            |                                             |                                              | <0.001                         |                                              |                                               | <0.001                         |
| median (IQR)                                        | 134 (120, 146)                              | 116 (110, 128)                               |                                | 132 (118, 146)                               | 122 (112, 135.2)                              |                                |
| Diastolic BP: 4th reading                           |                                             |                                              | <0.001                         |                                              |                                               | 0.061                          |
| median (IQR)                                        | 86 (79, 94)                                 | 78 (72, 85.5)                                |                                | 85 (78, 93.2)                                | 82.5 (76.8, 88.2)                             |                                |

\* The higher the worse; + Ldn: day-night adjusted sound level in decibel.

**Table S2.** Sound levels of highway and railway by day and night in both samples.

| Sound Source | Sound Level, dBA—Reduced Sample |        |                 | Day-Night Difference | Sound Level, dBA—Full Sample |        |                 | Day-Night Difference |
|--------------|---------------------------------|--------|-----------------|----------------------|------------------------------|--------|-----------------|----------------------|
|              | 5th Percentile                  | Median | 95th Percentile |                      | 5th Percentile               | Median | 95th Percentile |                      |
| Highway      |                                 |        |                 |                      |                              |        |                 |                      |
| Day          | 40.4                            | 52.9   | 59.8            | 6.9                  | 41.4                         | 52.5   | 59.6            | 6.9                  |
| Night        | 33.5                            | 46.0   | 52.9            |                      | 34.5                         | 45.6   | 52.7            |                      |
| Railway      |                                 |        |                 |                      |                              |        |                 |                      |
| Day          | 37.7                            | 46.6   | 63.8            | −2.8                 | 38.0                         | 45.8   | 63.3            | −2.8                 |
| Night        | 40.5                            | 49.4   | 66.6            |                      | 40.8                         | 48.6   | 66.1            |                      |

**Table S3.** Correlation between different sensitivities in the full sample (N = 807).

| Sensitivity Type          | Weather Sensitivity | Noise Sensitivity | Air Pollution Sensitivity | Vibration Sensitivity |
|---------------------------|---------------------|-------------------|---------------------------|-----------------------|
| Weather sensitivity       | 1.00                | 0.30              | 0.37                      | 0.18                  |
| Noise sensitivity         | 0.30                | 1.00              | 0.64                      | 0.66                  |
| Air pollution sensitivity | 0.37                | 0.64              | 1.00                      | 0.57                  |
| Vibration sensitivity     | 0.18                | 0.66              | 0.57                      | 1.00                  |

**Table S4.** Sex, reported hypotension, hypotension medication by sound level of sources.

| Sound Level, dBA, Ldn | Sex    |      | Hypotension Reported |     | Hypotension Medication |     |
|-----------------------|--------|------|----------------------|-----|------------------------|-----|
|                       | Female | Male | No                   | Yes | No                     | Yes |
| <b>Highway</b>        |        |      |                      |     |                        |     |
| <45                   | 42     | 36   | 68                   | 10  | 68                     | 10  |
| 45–54                 | 224    | 196  | 363                  | 57  | 378                    | 39  |
| 55–64                 | 149    | 130  | 238                  | 41  | 252                    | 26  |
| 65+                   | 0      | 3    | 3                    | 0   | 3                      | 0   |
| Sum                   | 415    | 365  | 672                  | 108 | 701                    | 75  |
| <b>Railway</b>        |        |      |                      |     |                        |     |
| <45                   | 8      | 6    | 12                   | 2   | 10                     | 3   |
| 45–54                 | 214    | 195  | 354                  | 55  | 368                    | 39  |
| 55–64                 | 139    | 127  | 235                  | 31  | 247                    | 18  |
| 65+                   | 54     | 37   | 71                   | 20  | 76                     | 15  |
| Sum                   | 415    | 365  | 672                  | 108 | 701                    | 75  |

**Table S4.** *Cont.*

| Sound Level, dBA, Ldn      | Sex    |      | Hypotension Reported |     | Hypotension Medication |     |
|----------------------------|--------|------|----------------------|-----|------------------------|-----|
|                            | Female | Male | No                   | Yes | No                     | Yes |
| <b>Overall sound level</b> |        |      |                      |     |                        |     |
| <45                        | 4      | 4    | 8                    | 0   | 7                      | 1   |
| 45–54                      | 118    | 103  | 192                  | 29  | 197                    | 22  |
| 55–64                      | 235    | 216  | 393                  | 58  | 412                    | 37  |
| 65+                        | 58     | 42   | 79                   | 21  | 85                     | 15  |
| Sum                        | 415    | 365  | 672                  | 108 | 701                    | 75  |

**Table S5.** Sociodemographic characteristics in both samples and census.

| Indicator                    | Overall Comparison of Samples |                 |        |
|------------------------------|-------------------------------|-----------------|--------|
|                              | Full Sample                   | Reduced Sample+ | Census |
| Male sex                     | 46.8                          | 42.5            | 48.0   |
| Female sex                   | 53.2                          | 57.5            | 52.0   |
| Higher education: 12+ years  | 19.0                          | 16.0            | 20.5   |
| Basic education: 9 years     | 25.0                          | 28.0            | N.A.   |
| Noise sensitivity: high      | 27.0                          | 29.0            | N.A.   |
| Weather sensitivity: high    | 20.0                          | 21.0            | N.A.   |
| Health status less than good | 46.0                          | 46.0            | N.A.   |
| Health status very good      | 15.0                          | 16.0            | N.A.   |
| Hypotension ever             | 28.9                          | 29.5            | N.A.   |
| Hypotension reported *       | 14.1                          | 15.2            | N.A.   |
| Hypotension medication *     | 9.8                           | 10.5            | N.A.   |
| Hypertension medication *    | 15.5                          | 16.1            | N.A.   |

+ with anthropometric measurements; \* past 12 month.
